# Supplementary material for: Epigenome-wide association study of whole blood gene expression in Framingham Heart Study participants provides molecular insight into the potential role of CHRNA5 in cigarette smoking-related lung diseases
Source: Springer Nature journal article supplement (doi:10.1186/s13148-021-01041-5), 2021-03-22
Supplement: MOESM1 [file 13148_2021_1041_MOESM1_ESM.pdf › 13148_2021_1041_MOESM1_ESM.pdf]

Fig 1. Association plot of cg01341801 with expression of *HLA-DRB5*

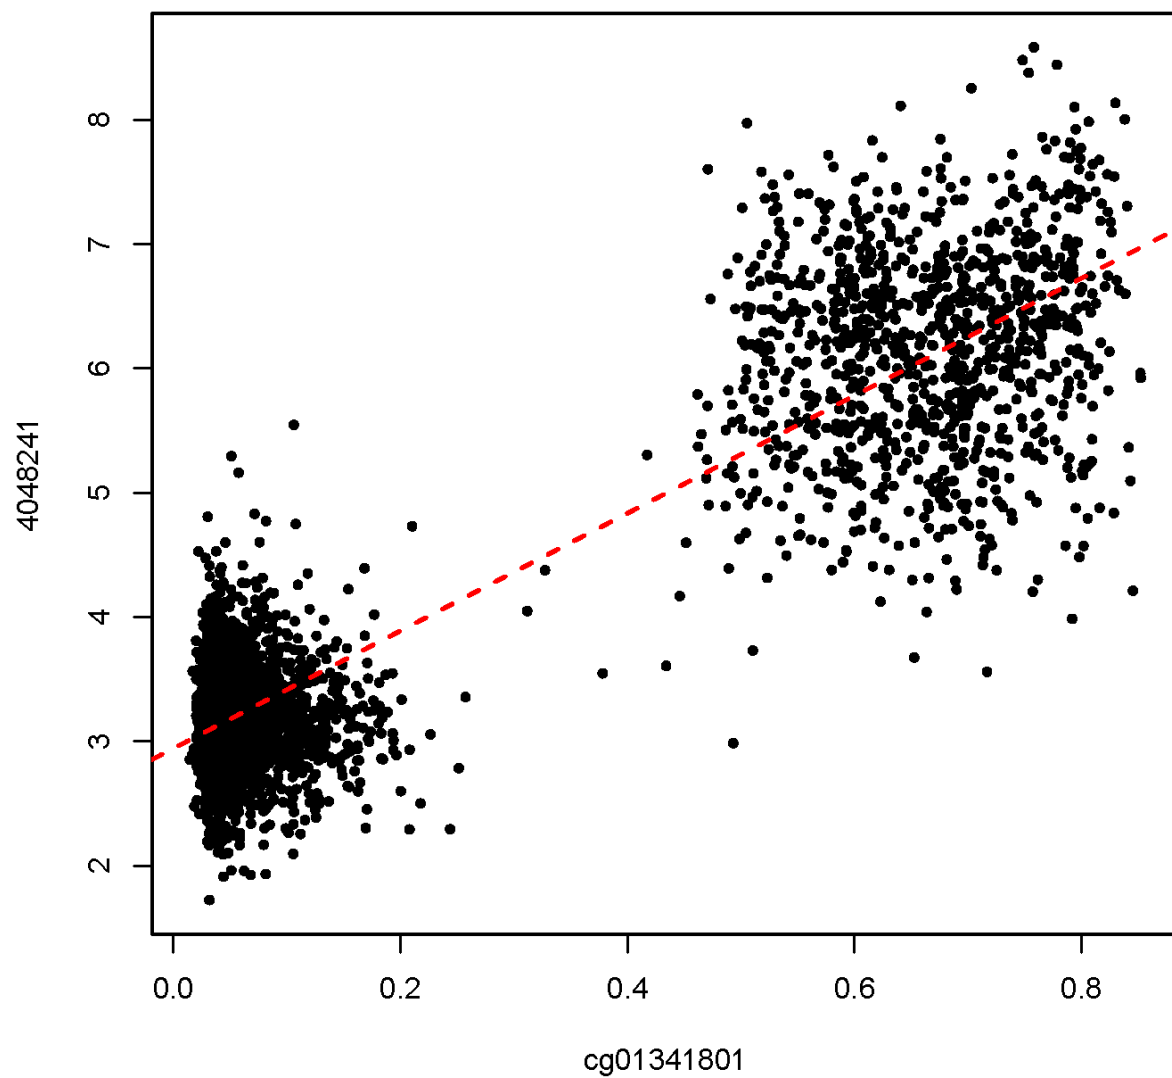

X axis represents the methylation value of cg01341801. Y axis represents the expression value of Affy transcript 4048241 (annotated to *HLA-DRB5* )

Figure . Association of pack years of smoking with methylation of cg19696491

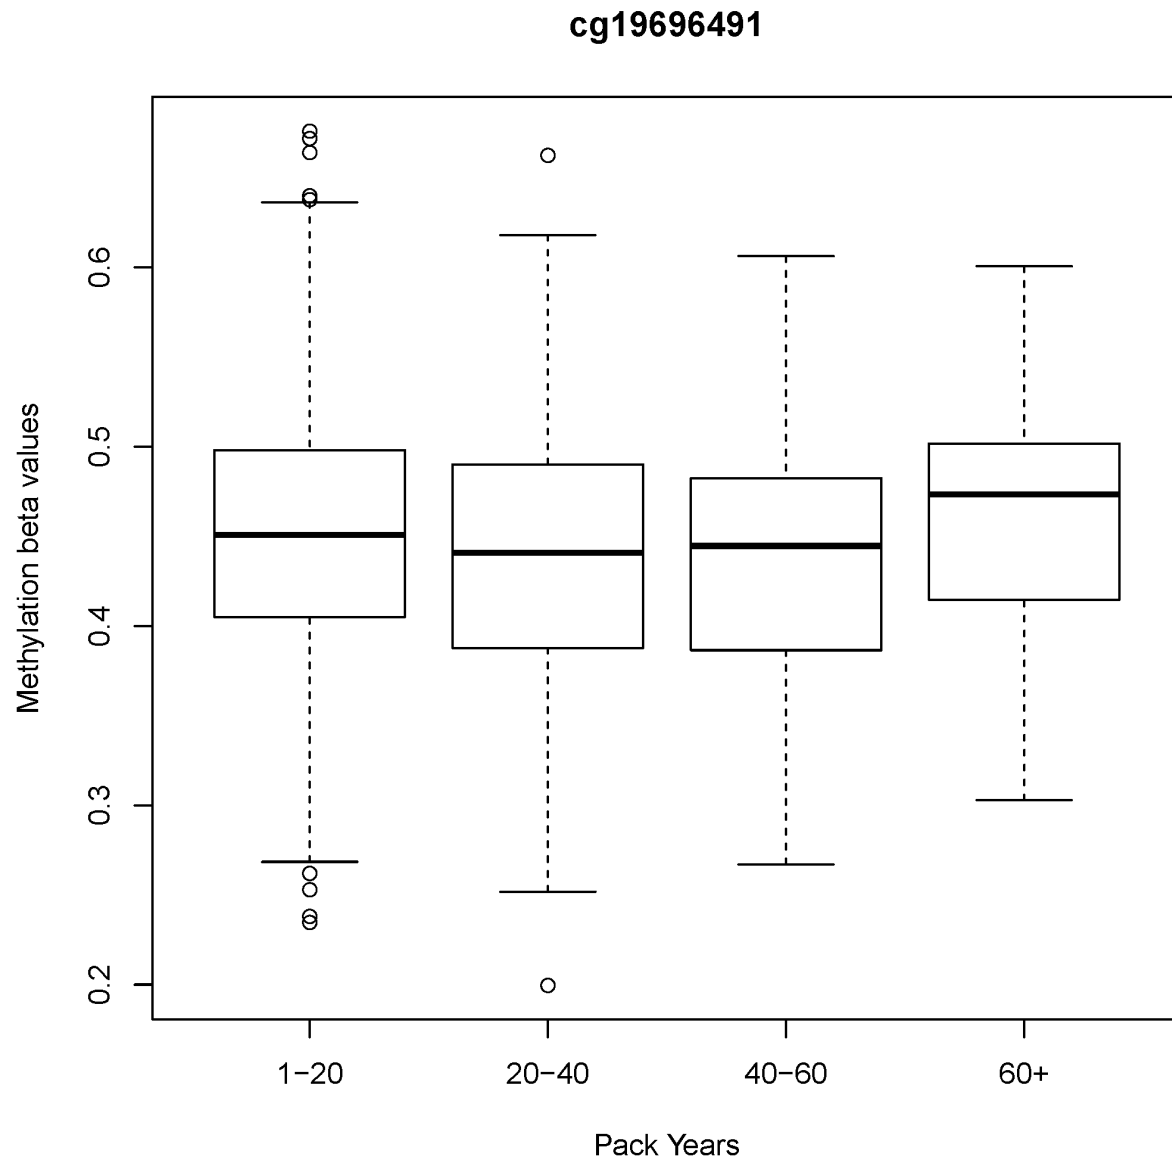

X axis represents the pack years of smoking. Y axis represents the methylation of cg19696491. Pack-years of smoking (<60) was inversely correlated ( $P=0.0006$ ) with methylation of cg19696491(*CHRNA5*).
